# Supplementary material for: Infrared actuation-induced simultaneous reconfiguration of surface color and morphology for soft robotics
Source: PubMed Central journal article supplement (PMC5727498; doi:10.1038/s41598-017-17904-y), 2017-12-13
Supplement: 41598_2017_17904_MOESM1_ESM.pdf [file 41598_2017_17904_MOESM1_ESM.pdf]

Supplementary information

Infrared actuation-induced simultaneous reconfiguration of surface color and morphology for soft robotics

Seyedali Banisadr & Jian Chen\*

Department of Chemistry and Biochemistry, University of Wisconsin-Milwaukee, Milwaukee,  
3210 North Cramer Street, Milwaukee, WI 53211, United States

Correspondence and requests for materials should be addressed to J.C. (email:  
jianchen@uwm.edu)

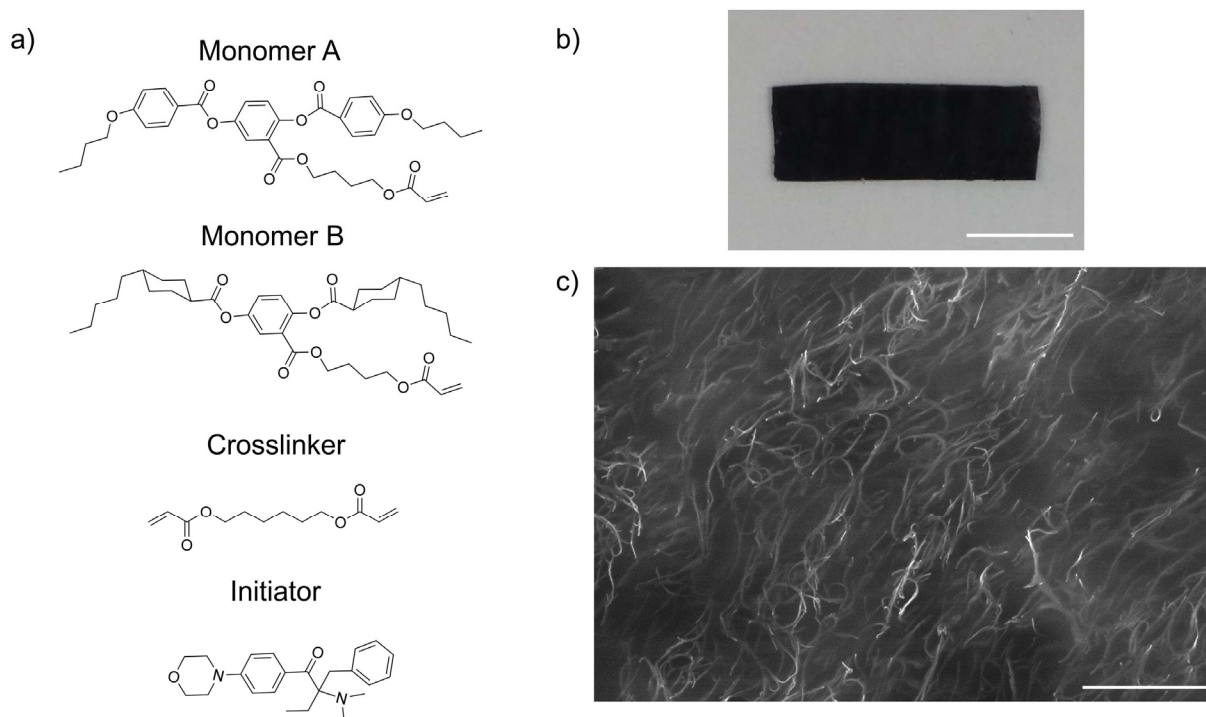

**Figure S1.** (a) Chemical structures of monomers, crosslinker, and initiator used in the preparation of LCE composites. (b) Photograph of the 0.1 wt% SWNT-LCE film. Scale bar: 5 mm. (c) SEM image of SWNTs in the 0.1 wt% SWNT-LCE film. The hot-drawing direction is roughly 50° relative to the scale bar. Scale bar: 5  $\mu\text{m}$ .

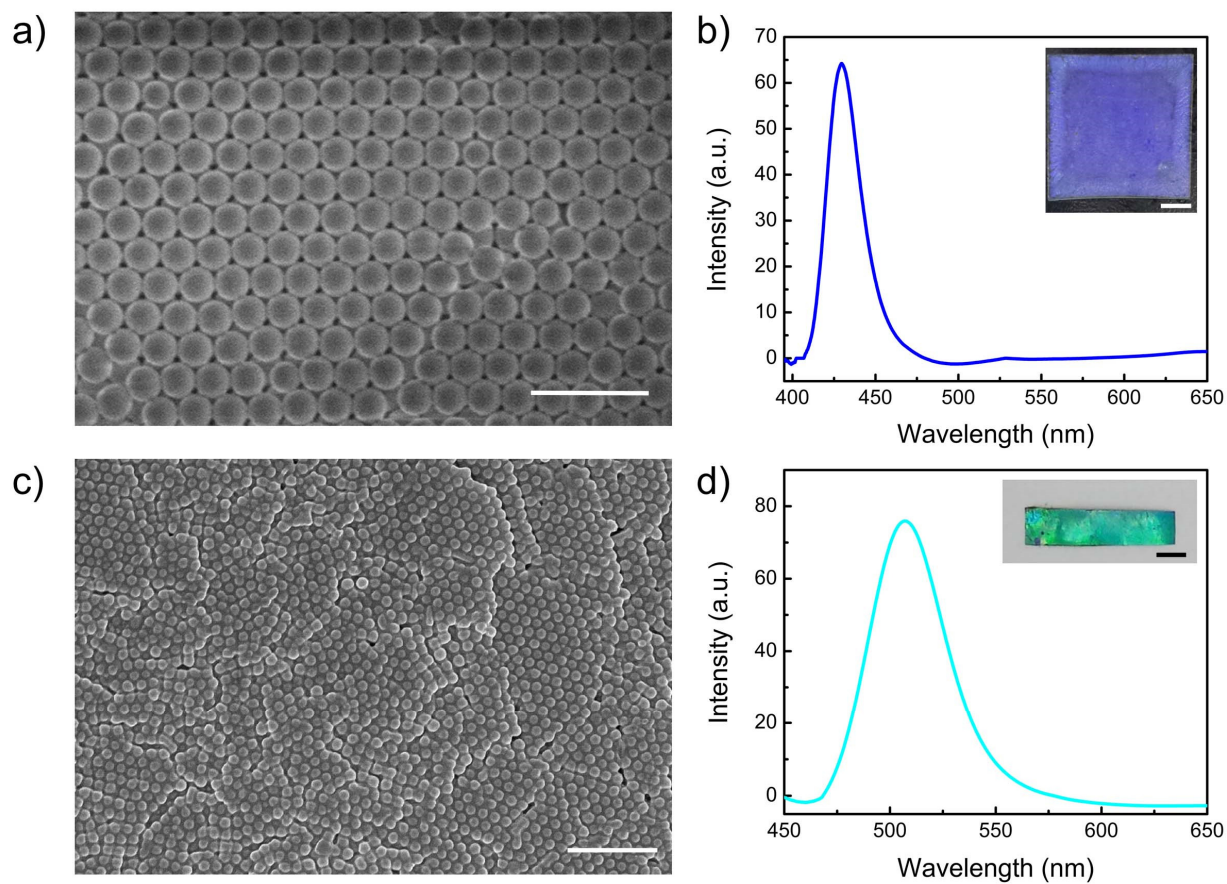

**Figure S2.** (a) SEM image of crosslinked PS nanospheres with diameter  $\sim 180$  nm. Scale bar: 500 nm. (b) Reflection spectrum ( $\vartheta = 90^\circ$ ) and photograph (inset) of the self-assembled photonic crystal film. Scale bar: 1 cm. (c) SEM image of crosslinked PS nanospheres embedded in PDMS matrix. Scale bar: 2  $\mu\text{m}$ . (d) Reflection spectrum ( $\vartheta = 90^\circ$ ) and photograph (inset) of the elastomeric photonic crystal film. Scale bar: 5 mm.

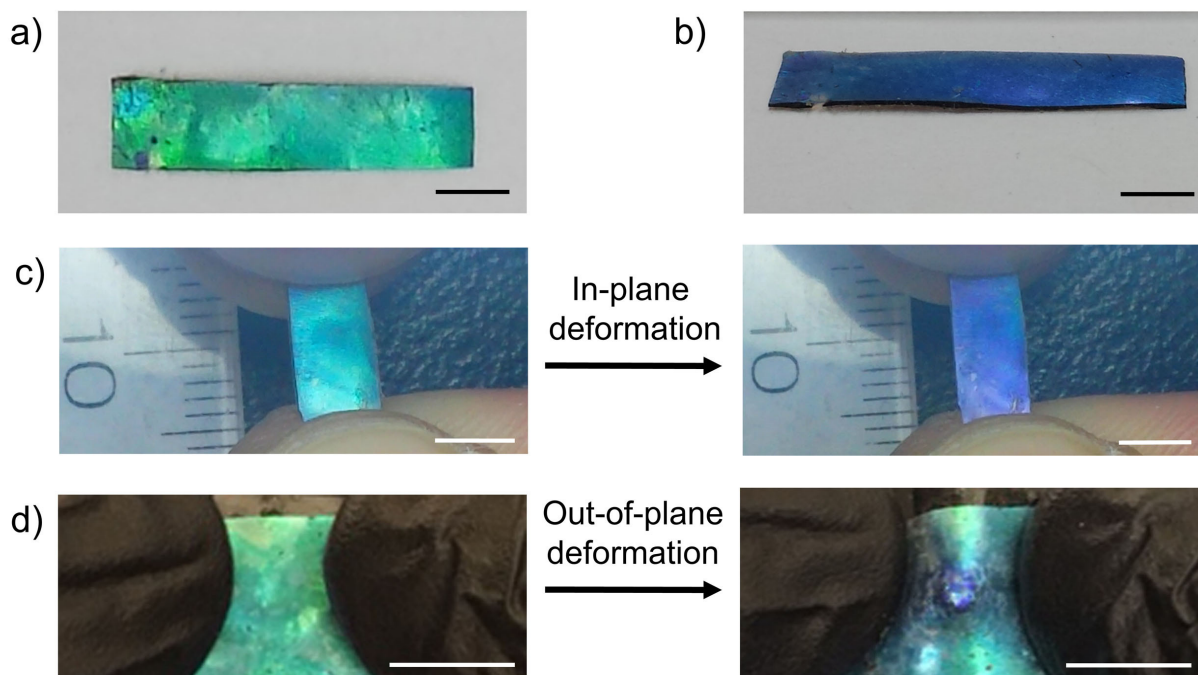

**Figure S3.** Photographs of (a) top view and (b) side view of the elastomeric photonic crystal film. (c) Photographs of the elastomeric photonic crystal film before and after being stretched. Scale bar: 5 mm. (d) Photographs of the elastomeric photonic crystal film before and after being deformed with a wooden stick. Scale bar: 1 cm.

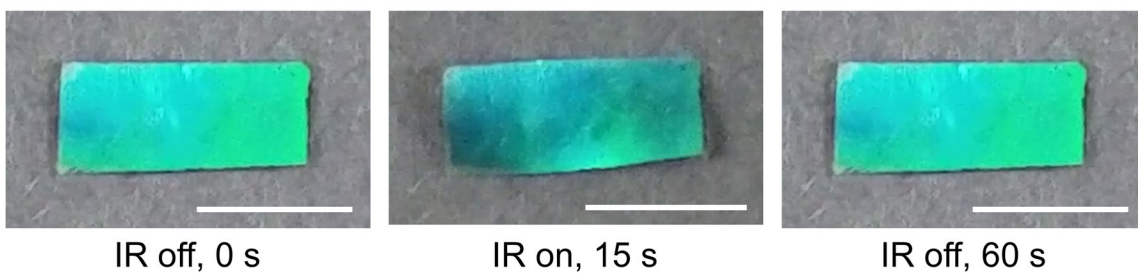

**Figure S4.** Photographs (top view) of reversible twisting and untwisting of the laminated film in response to global IR irradiation. The top-view photographs are taken at the fixed angle that is perpendicular to the substrate. Scale bar: 5 mm.

**Table S1.** Mechanical properties of the 0.1 wt% SWNT-LCE and laminated films at room temperature.

| Materials             | Tensile modulus (MPa) | Tensile strength (MPa) | Elongation at break (%) |
|-----------------------|-----------------------|------------------------|-------------------------|
| 0.1 wt% SWNT-LCE film | $0.68 \pm 0.04$       | $5.5 \pm 1.0$          | $41.0 \pm 4.9$          |
| Laminated film        | $0.70 \pm 0.09$       | $6.3 \pm 1.3$          | $57.3 \pm 4.9$          |

**Supplementary Movie S1:** Reversible bending actuation of the laminated film upon global IR irradiation.

**Supplementary Movie S2:** Inchworm-like walking of the laminated film on glass in response to on and off cycles of global IR irradiation.
